# Supplementary material for: Genome-wide mapping of nuclear mitochondrial DNA sequences links DNA replication origins to chromosomal double-strand break formation in Schizosaccharomyces pombe
Source: HighWire-hosted journal article supplement (doi:10.1101/gr.104513.109), 2010-08-05
Supplement: Lenglez_supplementary_legends.pdf [file Lenglez_supplementary_legends.pdf]

**Supplementary Figure 1. Nucleotide sequence of fission yeast NUMTs.** Nucleotide sequences of fission yeast NUMTs are compared to corresponding regions of mtDNA genome. BLAST scores are provided.

**Supplementary Figure 2.** Independent NUMT insertion sites from *S. pombe* (12) and *S. cerevisiae* (26) were classified according to their genomic localization: coding (blue) or non-coding (pink). NUMT distribution was compared to the expected frequency of coding (blue hatchings) or non-coding (pink hatchings) DNA sequences in both genomes.

**Supplementary Figure 3. *Saccharomyces cerevisiae* NUMTs associated with ARS.** The genomic loci of budding yeast NUMTs located next to ARS are described. ORFs are shown by white arrows, green boxes represent *Ty* transposons, tRNA-encoding genes are shown by blue arrows, ARS are represented by blue circles and NUMTs are in red.

**Supplementary Figure 4. Orp1/Mcm6 binding profiles described by Hayashi *et al.* (2007) at the genomic loci tested in Figure 4.**

**Supplementary Figure 5. Control for ChIP experiments with a constitutively expressed gene.** Lysates from *orp1::orp1-5flag* (AD552) and *orp1::orp1-5flag NUMT10/11Δ* (AD566) cells were subjected to ChIP analysis using anti-FLAG antibodies. Total chromatin (TOT) or DNA associated with immunoprecipitates (IP) was amplified using primer sets that amplify a 100-bp fragment of *cdc2* gene. Position of the PCR product (black box) is shown on *cdc2* ORF.

**Supplementary Figure 6. MtDNA fragments captured at extrachromosomal DSBs can act as DNA replication origins in the nucleus.** A. When introduced into yeast cells, PCR fragments comprising either *S. pombe ura4* or *S. cerevisiae LEU2* gene are circularized through NHEJ and mtDNA fragments are recovered at high frequency at repair junctions (Decottignies 2005). The *ura4* gene was PCR-amplified as described previously (Decottignies 2005). The 2.2 kb-*LEU2* fragment was amplified by PCR on pREP3 plasmid (Maundrell 1993) using primers 5'-ATACCTAATATTATTGCCTTAT and 5'-GACTTAAACTCCATCAAATG and *Taq* polymerase (Takara, Berkeley, CA). B. Yeast cells were transformed with 1.5 μg of either pREP3 circular plasmid (*ARS1*, *LEU2*), PCR-amplified *LEU2* gene, pREP4 circular plasmid (*ARS1*, *ura4*) or PCR-amplified *ura4* gene.

Yeast colonies recovered after transformation were counted. Results from two yeast transformations are shown. C. Maintenance of either *leu*<sup>+</sup> or *ura*<sup>+</sup> phenotype was tested after growing cells in non-selective medium for 5 days, with daily dilutions. The graph gives the percentage of colonies that retained the phenotype. D. The presence of mtDNA fragments in *ura4* episomes was detected by sequencing of PCR-amplified repair junctions as described previously (Decottignies 2005). MtDNA inserts at repair junctions of *LEU2* circles were amplified with 5'-TGAACAAGGAAGTACAGGAC and 5'-TGGCTCAACGTGATAAGGAA and sequenced with 5'-CATTAATATTGACAAGGAGG. E. Growth rate of three *ura*<sup>+</sup> and five *leu*<sup>+</sup> yeast colonies recovered after transformation with PCR-amplified DNA. Population doublings were measured for *ura*<sup>+</sup> colonies containing (*ura*/mtDNA) or not (*ura*/empty) mtDNA fragments in the *ura4* episomes and for *leu*<sup>+</sup> colonies with either mtDNA-containing *LEU2* episomes (*LEU*/mtDNA) or integrated *LEU2* gene (*LEU*/integrated). *LEU2* episomes without mtDNA insert were not recovered.

**Supplementary Figure 7. Mcm6 binding profiles described by Hayashi *et al.* (2007) at the genomic loci tested in Figure 6.**
